# Supplementary material for: Distinct Patterns of Dysregulated Expression of Enzymes Involved in Androgen Synthesis and Metabolism in Metastatic Prostate Cancer Tumors
Source: Oxford University Press journal article supplement (doi:10.1158/0008-5472.can-12-1335), 2012-09-13
Supplement: 00085472can121335-sup-t4_xls_91.xls [file 00085472can121335-sup-t4_xls_91.xls]

## Sheet: R values
R values	AKR1C3	AR	CYB5A	CYP11A1	CYP11B1	CYP11B2	CYP17A1	CYP19A1	CYP21A2	HSD17B1	HSD17B10	HSD17B11	HSD17B12	HSD17B13	HSD17B14	HSD17B2	HSD17B3	HSD17B4	HSD17B6	HSD17B7	HSD17B8	HSD3B1	HSD3B2	HSD3B7	RDH5	SHBG	SRD5A1	SRD5A2	SRD5A3	STAR	AKR1C1	AKR1C2	AKR1C4	CYP3A4	CYP3A43	CYP3A5	CYP3A7	UGT2B15	UGT2B17	UGT2B7
AKR1C3	1
AR	-0.00921684	1
CYB5A	-0.287507	0.141705	1
CYP11A1	-0.0752716	-0.205218	-0.402123	1
CYP11B1	-0.0352831	-0.19806	-0.448579	0.854651	1
CYP11B2	-0.0500496	-0.190915	-0.447758	0.8725	0.98453	1
CYP17A1	-0.0776088	-0.207237	-0.470031	0.891916	0.929156	0.947654	1
CYP19A1	-0.0348804	-0.238244	-0.442975	0.832866	0.837888	0.855017	0.869561	1
CYP21A2	-0.0271686	-0.220016	-0.460396	0.799564	0.834533	0.842795	0.855431	0.740443	1
HSD17B1	-0.0526473	-0.127709	-0.206898	0.643882	0.562855	0.583579	0.626166	0.569158	0.638733	1
HSD17B10	0.044696	0.278596	0.271284	-0.418931	-0.402374	-0.400966	-0.391284	-0.308854	-0.318966	0.040738	1
HSD17B11	0.183493	0.260815	-0.0762404	-0.362434	-0.268979	-0.264317	-0.304899	-0.333469	-0.362464	-0.443223	0.0776037	1
HSD17B12	0.0390819	0.375527	0.216709	-0.664779	-0.643404	-0.640827	-0.657925	-0.708174	-0.673305	-0.572653	0.279124	0.504752	1
HSD17B13	-0.124365	-0.0970764	-0.207299	0.227924	0.288962	0.308175	0.251071	0.177472	0.193218	0.0672573	-0.493627	0.031515	-0.105502	1
HSD17B14	-0.152139	-0.171013	0.0894879	0.0775118	0.0311675	0.0254668	0.0157294	0.0296959	0.152529	0.287296	0.0773865	-0.308201	-0.175879	-0.122859	1
HSD17B2	0.392362	-0.474216	-0.476276	0.524429	0.596838	0.601959	0.584842	0.581332	0.554316	0.378003	-0.317192	-0.159397	-0.511577	0.297147	-0.0531791	1
HSD17B3	-0.0593905	-0.0615504	-0.339361	0.700547	0.627697	0.668256	0.717313	0.712417	0.593522	0.478667	-0.405218	-0.265567	-0.595949	0.22415	0.0863594	0.463619	1
HSD17B4	-0.183226	0.204049	0.281539	-0.644508	-0.563082	-0.568859	-0.585406	-0.636284	-0.54903	-0.468615	0.29067	0.375482	0.640611	0.00609459	-0.159269	-0.45334	-0.518148	1
HSD17B6	-0.16305	-0.123468	0.385918	-0.0337508	-0.116809	-0.112744	-0.132133	-0.0803985	-0.148473	-0.259183	-0.257491	-0.192506	-0.00447278	0.0936373	0.144438	-0.159637	0.0286418	0.082938	1
HSD17B7	-0.0839544	-0.128327	0.184074	-0.393775	-0.362044	-0.352965	-0.393494	-0.234997	-0.353398	-0.22175	0.0540556	-0.0298995	0.115762	0.0719583	0.0282205	-0.0288305	-0.19306	0.247888	0.121258	1
HSD17B8	-0.242831	0.0602089	-0.0421937	0.27849	0.290219	0.287959	0.298162	0.304451	0.333233	0.531053	0.261124	-0.256975	-0.308953	-0.0526878	0.135797	0.00263393	0.0905251	-0.16967	-0.124992	-0.118708	1
HSD3B1	-0.042953	-0.216854	-0.422776	0.817793	0.811752	0.836908	0.847791	0.815115	0.804896	0.636766	-0.39265	-0.374738	-0.697707	0.364699	0.0660956	0.616431	0.675062	-0.567333	-0.0903703	-0.283127	0.36626	1
HSD3B2	-0.0566223	-0.230937	-0.448092	0.830952	0.842531	0.861947	0.870738	0.838155	0.828947	0.580981	-0.458131	-0.364719	-0.710251	0.361814	0.0722535	0.608198	0.694299	-0.58261	-0.0678425	-0.27976	0.328255	0.970957	1
HSD3B7	0.0578338	-0.15458	-0.450679	0.791757	0.841801	0.856098	0.851511	0.718714	0.810737	0.612484	-0.363509	-0.279959	-0.631022	0.334041	0.00431652	0.588248	0.642623	-0.513064	-0.101131	-0.376434	0.218346	0.785662	0.802643	1
RDH5	-0.0414926	-0.250192	-0.439974	0.832406	0.827287	0.836878	0.85349	0.731302	0.810237	0.554888	-0.443763	-0.350753	-0.626687	0.28332	0.115009	0.597212	0.691746	-0.59849	0.000751435	-0.298581	0.220286	0.769384	0.793409	0.816791	1
SHBG	-0.0205777	-0.190866	-0.407858	0.879733	0.844389	0.873768	0.917509	0.804621	0.855901	0.664887	-0.402299	-0.328368	-0.647078	0.206004	0.101647	0.587333	0.742787	-0.6098	-0.0770376	-0.375728	0.282984	0.823606	0.826753	0.821254	0.848676	1
SRD5A1	0.193885	0.394216	0.127633	-0.133479	-0.128798	-0.142932	-0.133237	-0.127272	-0.0463497	0.108399	0.406458	-0.0329578	0.0101928	-0.183569	-0.117766	-0.0677989	-0.179338	0.0438675	-0.1502	0.0267876	0.30034	0.00930856	-0.0524708	-0.0253019	-0.151473	-0.123969	1
SRD5A2	-0.198789	-0.291562	0.207297	-0.0947852	-0.235749	-0.253861	-0.24127	-0.240618	-0.248876	-0.355072	-0.288279	-0.0826396	0.0477207	-0.0804223	0.133039	-0.267738	-0.205296	-0.024082	0.397692	0.135363	-0.204822	-0.313833	-0.262891	-0.329544	-0.133024	-0.20019	-0.348657	1
SRD5A3	0.274588	0.216882	0.0321813	-0.0860877	-0.0483178	-0.0238246	-0.0334104	-0.0288341	-0.00644471	0.0986467	0.278274	0.187839	0.00533595	-0.129061	-0.015289	0.0689043	0.00477391	0.098333	-0.161878	-0.0628119	0.177916	0.0657897	0.03093	0.0462787	-0.0726257	0.00994156	0.372019	-0.363615	1
STAR	-0.0834536	-0.301496	-0.353161	0.814139	0.849507	0.849109	0.839607	0.850004	0.763299	0.668659	-0.334849	-0.444558	-0.72436	0.285713	0.14511	0.565012	0.619674	-0.621115	-0.0645528	-0.177412	0.313612	0.789979	0.798969	0.76793	0.752567	0.77397	-0.120682	-0.203023	-0.118012	1
AKR1C1	0.945242	-0.163254	-0.274846	-0.0648587	-0.0745743	-0.0866389	-0.111679	-0.0395284	-0.0359292	-0.065431	0.0269494	0.105163	0.000359873	-0.133675	-0.0889845	0.419101	-0.0692489	-0.188437	-0.108238	-0.0202058	-0.280761	-0.0721237	-0.0831505	0.0200355	-0.0421199	-0.0426199	0.0830789	-0.0297051	0.176696	-0.07897	1
AKR1C2	0.935813	-0.21142	-0.292546	-0.0272747	-0.026519	-0.0363277	-0.0655875	0.00318626	0.00274057	-0.0282969	-0.00476108	0.0949309	-0.0386666	-0.0591317	-0.0990608	0.494134	-0.0338037	-0.194925	-0.0969576	0.00111579	-0.282814	-0.00636428	-0.0220572	0.0715149	0.00561295	-0.00546075	0.0821203	-0.0674811	0.179613	-0.0238472	0.990385	1
AKR1C4	0.886757	-0.063955	-0.447623	0.215385	0.290365	0.279183	0.23396	0.290729	0.255573	0.115972	-0.136946	0.0391445	-0.194845	0.0603888	-0.142812	0.566622	0.184315	-0.363939	-0.162658	-0.155858	-0.143986	0.267751	0.269573	0.346703	0.248172	0.25547	0.0648601	-0.25011	0.195055	0.231023	0.85674	0.868648	1
CYP3A4	0.0246037	-0.422414	-0.158377	0.194299	0.191058	0.201232	0.183639	0.270526	0.156106	0.169258	-0.362282	-0.346464	-0.377949	0.298378	0.0425038	0.42614	0.139886	-0.266319	0.0642471	0.330263	0.113982	0.333262	0.32882	0.134694	0.219941	0.188851	-0.130869	0.231866	-0.0685789	0.394035	0.10496	0.155382	0.150917	1
CYP3A43	-0.00542739	-0.158392	-0.289028	0.607538	0.61659	0.640941	0.624036	0.725854	0.553426	0.396714	-0.310468	-0.323388	-0.591218	0.187488	0.116293	0.438724	0.620677	-0.509186	0.0907562	-0.100062	0.336785	0.683312	0.715973	0.495686	0.556089	0.603653	-0.0454913	-0.109668	0.0610757	0.656378	-0.0334636	0.00402636	0.230591	0.47881	1
CYP3A5	0.00998034	-0.334531	-0.0365095	-0.0690027	-0.0605024	-0.0533719	-0.0769154	-0.0265206	-0.1443	-0.175111	-0.250203	-0.0847783	0.000442934	0.123652	-0.00463161	0.179764	-0.133246	-0.0488647	0.100703	0.320083	-0.015391	-0.0767659	-0.054205	-0.172853	-0.0398644	-0.0638914	-0.23248	0.484541	-0.141909	0.0102565	0.114655	0.125568	0.0197955	0.792987	0.240862	1
CYP3A7	0.0354167	-0.406988	-0.29291	0.445876	0.464	0.474487	0.462708	0.53528	0.408168	0.278555	-0.423974	-0.363679	-0.520696	0.319182	0.0207276	0.600219	0.358189	-0.436682	0.0306391	0.100915	0.242387	0.572921	0.577042	0.345158	0.453617	0.468976	-0.116787	0.128003	-0.0400497	0.527572	0.097738	0.15073	0.244006	0.877203	0.672759	0.688184	1
UGT2B15	0.560991	0.116874	-0.236017	0.262193	0.36553	0.372489	0.306375	0.35049	0.254742	0.218246	-0.165657	0.0279075	-0.284168	0.216298	-0.144409	0.412876	0.308258	-0.360238	-0.190224	-0.140806	0.0158701	0.387512	0.370592	0.382864	0.247511	0.316721	0.130576	-0.382549	0.293408	0.328719	0.443402	0.468745	0.672969	0.175979	0.293766	-0.0574927	0.271915	1
UGT2B17	0.56384	0.114711	-0.227333	0.252543	0.354177	0.360496	0.294612	0.343047	0.24133	0.208366	-0.160576	0.031748	-0.282397	0.20197	-0.147852	0.408919	0.301977	-0.365769	-0.187863	-0.136242	0.00892784	0.374823	0.357127	0.373571	0.234951	0.304507	0.134251	-0.371849	0.288547	0.321875	0.447772	0.471846	0.670357	0.171066	0.285889	-0.0558212	0.264971	0.998355	1
UGT2B7	0.0575958	-0.123694	-0.171024	0.437249	0.531942	0.561906	0.508742	0.578989	0.462355	0.310623	-0.298471	-0.156942	-0.504301	0.374076	-0.153525	0.485723	0.440645	-0.379883	-0.049781	-0.0310816	0.138887	0.651728	0.642565	0.494895	0.413152	0.463475	0.0492011	-0.324599	0.130414	0.564469	0.00683063	0.0768531	0.291712	0.33478	0.515894	-0.0304169	0.47216	0.654404	0.653176	1

## Sheet: R2 values
R2 Values	AKR1C3	AR	CYB5A	CYP11A1	CYP11B1	CYP11B2	CYP17A1	CYP19A1	CYP21A2	HSD17B1	HSD17B10	HSD17B11	HSD17B12	HSD17B13	HSD17B14	HSD17B2	HSD17B3	HSD17B4	HSD17B6	HSD17B7	HSD17B8	HSD3B1	HSD3B2	HSD3B7	RDH5	SHBG	SRD5A1	SRD5A2	SRD5A3	STAR	AKR1C1	AKR1C2	AKR1C4	CYP3A4	CYP3A43	CYP3A5	CYP3A7	UGT2B15	UGT2B17	UGT2B7
AKR1C3	1
AR	8.49502e-05	1
CYB5A	0.0826602	0.0200803	1
CYP11A1	0.00566581	0.0421146	0.161703	1
CYP11B1	0.0012449	0.0392276	0.201223	0.730428	1
CYP11B2	0.00250496	0.0364484	0.200487	0.761256	0.969299	1
CYP17A1	0.00602313	0.0429471	0.220929	0.795514	0.863331	0.898048	1
CYP19A1	0.00121664	0.0567601	0.196227	0.693666	0.702056	0.731054	0.756136	1
CYP21A2	0.000738135	0.0484073	0.211965	0.639302	0.696446	0.710304	0.731762	0.548256	1
HSD17B1	0.00277174	0.0163097	0.0428069	0.414583	0.316806	0.340565	0.392084	0.32394	0.40798	1
HSD17B10	0.00199773	0.0776157	0.073595	0.175503	0.161905	0.160774	0.153103	0.0953911	0.101739	0.00165958	1
HSD17B11	0.0336697	0.0680243	0.0058126	0.131358	0.0723497	0.0698633	0.0929633	0.111202	0.13138	0.196446	0.00602233	1
HSD17B12	0.00152739	0.141021	0.0469628	0.441932	0.413969	0.41066	0.432866	0.501511	0.45334	0.327931	0.0779101	0.254774	1
HSD17B13	0.0154666	0.00942382	0.0429727	0.0519495	0.083499	0.0949715	0.0630367	0.0314965	0.0373334	0.00452354	0.243668	0.000993198	0.0111307	1
HSD17B14	0.0231463	0.0292454	0.00800809	0.00600809	0.000971411	0.000648558	0.000247414	0.000881846	0.0232651	0.0825392	0.00598868	0.094988	0.0309334	0.0150944	1
HSD17B2	0.153948	0.22488	0.226839	0.275026	0.356215	0.362354	0.34204	0.337947	0.307266	0.142886	0.100611	0.0254074	0.261711	0.0882966	0.00282801	1
HSD17B3	0.00352723	0.00378845	0.115166	0.490766	0.394003	0.446566	0.514538	0.507538	0.352268	0.229123	0.164202	0.0705259	0.355155	0.0502433	0.00745795	0.214943	1
HSD17B4	0.0335717	0.0416361	0.0792641	0.41539	0.317061	0.323601	0.3427	0.404858	0.301434	0.2196	0.0844891	0.140987	0.410382	3.7144e-05	0.0253665	0.205518	0.268477	1
HSD17B6	0.0265852	0.0152444	0.148933	0.00113912	0.0136444	0.0127113	0.0174591	0.00646392	0.0220442	0.0671757	0.0663017	0.0370584	2.00058e-05	0.00876794	0.0208624	0.0254841	0.000820356	0.0068787	1
HSD17B7	0.00704834	0.0164679	0.0338831	0.155058	0.131076	0.124584	0.154837	0.0552237	0.12489	0.049173	0.00292201	0.00089398	0.0134009	0.00517799	0.000796399	0.000831197	0.037272	0.0614487	0.0147035	1
HSD17B8	0.0589668	0.00362511	0.00178031	0.0775567	0.084227	0.0829201	0.0889007	0.0926902	0.111044	0.282017	0.0681859	0.0660364	0.095452	0.002776	0.0184409	6.93757e-06	0.0081948	0.0287878	0.015623	0.0140916	1
HSD3B1	0.00184496	0.0470258	0.178739	0.668785	0.658941	0.700415	0.71875	0.664413	0.647857	0.405471	0.154174	0.140428	0.486795	0.133005	0.00436863	0.379987	0.455708	0.321867	0.0081668	0.0801607	0.134146	1
HSD3B2	0.00320608	0.0533319	0.200787	0.690481	0.709859	0.742952	0.758184	0.702504	0.687153	0.337538	0.209884	0.13302	0.504457	0.13091	0.00522057	0.369905	0.482051	0.339435	0.0046026	0.0782656	0.107751	0.942758	1
HSD3B7	0.00334474	0.023895	0.203112	0.62688	0.708629	0.732904	0.725071	0.51655	0.657294	0.375137	0.132139	0.078377	0.398188	0.111584	1.86323e-05	0.346036	0.412964	0.263235	0.0102275	0.141702	0.0476751	0.617265	0.644236	1
RDH5	0.00172163	0.0625962	0.193577	0.692899	0.684405	0.700365	0.728444	0.534803	0.656485	0.3079	0.196925	0.123028	0.392736	0.08027	0.013227	0.356662	0.478513	0.35819	5.64655e-07	0.0891505	0.0485258	0.591952	0.629497	0.667147	1
SHBG	0.00042344	0.03643	0.166349	0.77393	0.712994	0.76347	0.841822	0.647414	0.732567	0.442075	0.161845	0.107826	0.41871	0.0424377	0.0103322	0.34496	0.551733	0.371856	0.0059348	0.141172	0.0800802	0.678327	0.683521	0.674457	0.720252	1
SRD5A1	0.0375912	0.155406	0.0162903	0.0178166	0.016589	0.0204295	0.0177521	0.0161981	0.0021483	0.0117502	0.165208	0.00108621	0.000103894	0.0336976	0.0138687	0.00459669	0.0321619	0.00192436	0.02256	0.000717575	0.090204	8.66492e-05	0.00275319	0.000640185	0.0229441	0.0153684	1
SRD5A2	0.039517	0.0850086	0.0429719	0.00898423	0.0555776	0.0644453	0.0582115	0.0578972	0.0619391	0.126076	0.0831045	0.00682931	0.00227727	0.00646775	0.0176993	0.0716834	0.0421463	0.000579945	0.158159	0.0183231	0.041952	0.0984914	0.0691118	0.108599	0.0176953	0.0400761	0.121562	1
SRD5A3	0.0753984	0.0470376	0.00103563	0.00741109	0.00233461	0.000567611	0.00111625	0.000831404	4.15343e-05	0.00973117	0.0774366	0.0352834	2.84723e-05	0.0166567	0.000233753	0.0047478	2.27903e-05	0.00966938	0.0262045	0.00394534	0.0316542	0.00432829	0.000956666	0.00214172	0.00527449	9.88347e-05	0.138398	0.132216	1
STAR	0.0069645	0.0908997	0.124722	0.662822	0.721663	0.720986	0.704939	0.722507	0.582625	0.447104	0.112124	0.197632	0.524697	0.0816322	0.0210569	0.319238	0.383996	0.385784	0.00416706	0.031475	0.0983527	0.624068	0.638351	0.589716	0.566357	0.59903	0.0145642	0.0412185	0.0139269	1
AKR1C1	0.893483	0.0266518	0.0755405	0.00420665	0.00556133	0.0075063	0.0124721	0.0015625	0.00129091	0.00428121	0.000726269	0.0110592	1.29509e-07	0.0178691	0.00791825	0.175646	0.00479541	0.0355083	0.0117156	0.000408276	0.0788266	0.00520183	0.00691401	0.000401422	0.00177408	0.00181646	0.0069021	0.000882395	0.0312214	0.00623626	1
AKR1C2	0.875746	0.0446983	0.0855832	0.000743907	0.000703258	0.0013197	0.00430172	1.01522e-05	7.51072e-06	0.000800716	2.26679e-05	0.00901188	0.00149511	0.00349656	0.00981303	0.244168	0.00114269	0.0379958	0.00940077	1.24498e-06	0.079984	4.05041e-05	0.000486519	0.00511438	3.15052e-05	2.98198e-05	0.00674375	0.0045537	0.0322608	0.000568689	0.980863	1
AKR1C4	0.786338	0.00409024	0.200366	0.0463909	0.0843116	0.0779434	0.0547373	0.0845236	0.0653175	0.0134494	0.0187543	0.00153229	0.0379645	0.0036468	0.0203952	0.32106	0.0339721	0.132451	0.0264577	0.0242917	0.0207318	0.0716905	0.0726697	0.120203	0.0615894	0.065265	0.00420684	0.0625549	0.0380466	0.0533716	0.734003	0.75455	1
CYP3A4	0.000605342	0.178434	0.0250832	0.0377519	0.0365031	0.0404941	0.0337234	0.0731846	0.0243691	0.0286483	0.131248	0.120037	0.142846	0.0890294	0.00180658	0.181595	0.019568	0.0709261	0.00412769	0.109074	0.0129919	0.111064	0.108122	0.0181425	0.0483741	0.0356647	0.0171267	0.0537621	0.00470306	0.155264	0.0110166	0.0241436	0.022776	1
CYP3A43	2.94565e-05	0.0250881	0.0835371	0.369102	0.380183	0.410805	0.38942	0.526864	0.306281	0.157382	0.0963902	0.10458	0.349539	0.0351518	0.013524	0.192478	0.38524	0.25927	0.00823669	0.0100124	0.113424	0.466916	0.512617	0.245705	0.309235	0.364397	0.00206946	0.0120271	0.00373024	0.430832	0.00111981	1.62116e-05	0.0531721	0.229259	1
CYP3A5	9.96073e-05	0.111911	0.00133295	0.00476137	0.00366054	0.00284856	0.00591599	0.000703343	0.0208224	0.0306637	0.0626016	0.00718736	1.9619e-07	0.0152899	2.14518e-05	0.0323152	0.0177546	0.00238776	0.0101411	0.102453	0.000236883	0.005893	0.00293818	0.0298782	0.00158917	0.00408211	0.0540472	0.23478	0.0201381	0.000105196	0.0131459	0.0157672	0.000391863	0.628828	0.0580143	1
CYP3A7	0.00125434	0.165639	0.0857962	0.198805	0.215296	0.225138	0.214099	0.286524	0.166601	0.0775926	0.179754	0.132262	0.271124	0.101877	0.000429634	0.360263	0.1283	0.190692	0.000938752	0.0101837	0.0587517	0.328239	0.332978	0.119134	0.205769	0.219938	0.0136392	0.0163848	0.00160398	0.278332	0.00955271	0.0227195	0.0595388	0.769485	0.452605	0.473598	1
UGT2B15	0.31471	0.0136596	0.0557041	0.0687453	0.133612	0.138748	0.0938656	0.122844	0.0648933	0.0476313	0.0274421	0.000778827	0.0807515	0.0467847	0.0208538	0.170467	0.0950229	0.129771	0.0361853	0.0198262	0.00025186	0.150166	0.137338	0.146584	0.0612619	0.100312	0.0170501	0.146343	0.0860881	0.108056	0.196605	0.219722	0.452887	0.0309685	0.0862982	0.00330542	0.0739378	1
UGT2B17	0.317916	0.0131585	0.0516801	0.0637777	0.125441	0.129958	0.0867965	0.117681	0.0582401	0.0434163	0.0257846	0.00100794	0.0797478	0.040792	0.0218602	0.167215	0.0911898	0.133787	0.0352925	0.0185618	7.97064e-05	0.140492	0.12754	0.139555	0.055202	0.0927245	0.0180233	0.138272	0.0832595	0.103604	0.2005	0.222639	0.449378	0.0292636	0.0817325	0.003116	0.0702098	0.996712	1
UGT2B7	0.00331728	0.0153002	0.029249	0.191186	0.282962	0.315739	0.258818	0.335229	0.213772	0.0964869	0.0890851	0.0246308	0.254319	0.139933	0.0235698	0.235927	0.194168	0.144311	0.00247814	0.000966063	0.0192897	0.42475	0.41289	0.244921	0.170694	0.214809	0.00242075	0.105364	0.0170079	0.318626	4.66575e-05	0.0059064	0.0850958	0.112078	0.266147	0.000925186	0.222935	0.428245	0.426639	1

## Sheet: P values
P Values	AKR1C3	AR	CYB5A	CYP11A1	CYP11B1	CYP11B2	CYP17A1	CYP19A1	CYP21A2	HSD17B1	HSD17B10	HSD17B11	HSD17B12	HSD17B13	HSD17B14	HSD17B2	HSD17B3	HSD17B4	HSD17B6	HSD17B7	HSD17B8	HSD3B1	HSD3B2	HSD3B7	RDH5	SHBG	SRD5A1	SRD5A2	SRD5A3	STAR	AKR1C1	AKR1C2	AKR1C4	CYP3A4	CYP3A43	CYP3A5	CYP3A7	UGT2B15	UGT2B17	UGT2B7
AKR1C3	1
AR	0.9109	1
CYB5A	0.0004	0.0837	1
CYP11A1	0.3599	0.0118	< 0.0001	1
CYP11B1	0.6682	0.0151	< 0.0001	< 0.0001	1
CYP11B2	0.543	0.0193	< 0.0001	< 0.0001	< 0.0001	1
CYP17A1	0.3452	0.0109	< 0.0001	< 0.0001	< 0.0001	< 0.0001	1
CYP19A1	0.6717	0.0033	< 0.0001	< 0.0001	< 0.0001	< 0.0001	< 0.0001	1
CYP21A2	0.7414	0.0068	< 0.0001	< 0.0001	< 0.0001	< 0.0001	< 0.0001	< 0.0001	1
HSD17B1	0.5223	0.1194	0.0111	< 0.0001	< 0.0001	< 0.0001	< 0.0001	< 0.0001	< 0.0001	1
HSD17B10	0.5871	0.0006	0.0008	< 0.0001	< 0.0001	< 0.0001	< 0.0001	0.0001	< 0.0001	0.6206	1
HSD17B11	0.0246	0.0013	0.3538	< 0.0001	0.0009	0.0011	0.0001	< 0.0001	< 0.0001	< 0.0001	0.3452	1
HSD17B12	0.6349	< 0.0001	0.0077	< 0.0001	< 0.0001	< 0.0001	< 0.0001	< 0.0001	< 0.0001	< 0.0001	0.0005	< 0.0001	1
HSD17B13	0.1294	0.2373	0.0109	0.005	0.0003	0.0001	0.0019	0.0298	0.0178	0.4135	< 0.0001	0.7018	0.1988	1
HSD17B14	0.0631	0.0364	0.2761	0.3458	0.705	0.7571	0.8485	0.7183	0.0624	0.0004	0.3466	0.0001	0.0313	0.1342	1
HSD17B2	< 0.0001	< 0.0001	< 0.0001	< 0.0001	< 0.0001	< 0.0001	< 0.0001	< 0.0001	< 0.0001	< 0.0001	< 0.0001	0.0514	< 0.0001	0.0002	0.5181	1
HSD17B3	0.4703	0.4543	< 0.0001	< 0.0001	< 0.0001	< 0.0001	< 0.0001	< 0.0001	< 0.0001	< 0.0001	< 0.0001	0.001	< 0.0001	0.0058	0.2933	< 0.0001	1
HSD17B4	0.0248	0.0123	0.0005	< 0.0001	< 0.0001	< 0.0001	< 0.0001	< 0.0001	< 0.0001	< 0.0001	0.0003	< 0.0001	< 0.0001	0.941	0.0516	< 0.0001	< 0.0001	1
HSD17B6	0.0462	0.1322	< 0.0001	0.6818	0.1546	0.1695	0.107	0.3281	0.0698	0.0014	0.0015	0.0183	0.9567	0.2544	0.0778	0.051	0.7279	0.313	1
HSD17B7	0.3071	0.1176	0.0241	< 0.0001	< 0.0001	< 0.0001	< 0.0001	0.0038	< 0.0001	0.0064	0.5112	0.7164	0.1583	0.3816	0.7317	0.7262	0.0179	0.0022	0.1394	1
HSD17B8	0.0028	0.4642	0.6082	0.0006	0.0003	0.0004	0.0002	0.0002	< 0.0001	< 0.0001	0.0012	0.0015	0.0001	0.5219	0.0975	0.9745	0.2706	0.0379	0.1275	0.1479	1
HSD3B1	0.6017	0.0077	< 0.0001	< 0.0001	< 0.0001	< 0.0001	< 0.0001	< 0.0001	< 0.0001	< 0.0001	< 0.0001	< 0.0001	< 0.0001	< 0.0001	0.4216	< 0.0001	< 0.0001	< 0.0001	0.2714	0.0004	< 0.0001	1
HSD3B2	0.4913	0.0045	< 0.0001	< 0.0001	< 0.0001	< 0.0001	< 0.0001	< 0.0001	< 0.0001	< 0.0001	< 0.0001	< 0.0001	< 0.0001	< 0.0001	0.3796	< 0.0001	< 0.0001	< 0.0001	0.4094	0.0005	< 0.0001	< 0.0001	1
HSD3B7	0.4821	0.0589	< 0.0001	< 0.0001	< 0.0001	< 0.0001	< 0.0001	< 0.0001	< 0.0001	< 0.0001	< 0.0001	0.0005	< 0.0001	< 0.0001	0.9582	< 0.0001	< 0.0001	< 0.0001	0.2182	< 0.0001	0.0073	< 0.0001	< 0.0001	1
RDH5	0.6142	0.002	< 0.0001	< 0.0001	< 0.0001	< 0.0001	< 0.0001	< 0.0001	< 0.0001	< 0.0001	< 0.0001	< 0.0001	< 0.0001	0.0004	0.1611	< 0.0001	< 0.0001	< 0.0001	0.9927	0.0002	0.0068	< 0.0001	< 0.0001	< 0.0001	1
SHBG	0.8026	0.0193	< 0.0001	< 0.0001	< 0.0001	< 0.0001	< 0.0001	< 0.0001	< 0.0001	< 0.0001	< 0.0001	< 0.0001	< 0.0001	0.0114	0.2158	< 0.0001	< 0.0001	< 0.0001	0.3488	< 0.0001	0.0005	< 0.0001	< 0.0001	< 0.0001	< 0.0001	1
SRD5A1	0.0174	< 0.0001	0.1196	0.1034	0.1162	0.081	0.1041	0.1207	0.5733	0.1867	< 0.0001	0.6889	0.9015	0.0245	0.1512	0.4097	0.0281	0.594	0.0666	0.7449	0.0002	0.91	0.5237	0.7586	0.0643	0.1307	1
SRD5A2	0.0147	0.0003	0.0109	0.2486	0.0037	0.0017	0.0029	0.003	0.0021	< 0.0001	0.0003	0.3147	0.562	0.3279	0.1046	0.0009	0.0117	0.7699	< 0.0001	0.0986	0.0119	< 0.0001	0.0012	< 0.0001	0.1046	0.014	< 0.0001	1
SRD5A3	0.0007	0.0077	0.6958	0.2949	0.5571	0.7723	0.6848	0.7261	0.9376	0.2298	0.0006	0.0213	0.9483	0.1155	0.8527	0.4021	0.9538	0.2312	0.0478	0.4451	0.0294	0.4238	0.7071	0.5739	0.3771	0.9039	< 0.0001	< 0.0001	1
STAR	0.31	0.0002	< 0.0001	< 0.0001	< 0.0001	< 0.0001	< 0.0001	< 0.0001	< 0.0001	< 0.0001	< 0.0001	< 0.0001	< 0.0001	0.0004	0.0764	< 0.0001	< 0.0001	< 0.0001	0.4326	0.0299	< 0.0001	< 0.0001	< 0.0001	< 0.0001	< 0.0001	< 0.0001	0.1413	0.0127	0.1504	1
AKR1C1	< 0.0001	0.0459	0.0007	0.4304	0.3644	0.2918	0.1736	0.631	0.6625	0.4263	0.7434	0.2003	0.9965	0.1029	0.2789	< 0.0001	0.3998	0.0209	0.1874	0.8061	0.0005	0.3804	0.3117	0.8077	0.6088	0.6046	0.3121	0.7182	0.0305	0.3368	1
AKR1C2	< 0.0001	0.0094	0.0003	0.7404	0.7474	0.659	0.4252	0.9691	0.9734	0.731	0.9539	0.2479	0.6385	0.4722	0.2278	< 0.0001	0.6813	0.0168	0.2379	0.9892	0.0005	0.9384	0.7888	0.3845	0.9456	0.9471	0.3178	0.4119	0.0279	0.7721	< 0.0001	1
AKR1C4	< 0.0001	0.4368	< 0.0001	0.0081	0.0003	0.0005	0.004	0.0003	0.0016	0.1576	0.0947	0.6344	0.0169	0.4629	0.0813	< 0.0001	0.024	< 0.0001	0.0467	0.0568	0.0788	0.0009	0.0009	< 0.0001	0.0022	0.0016	0.4304	0.002	0.0168	0.0045	< 0.0001	< 0.0001	1
CYP3A4	0.765	< 0.0001	0.0529	0.0172	0.0192	0.0135	0.0245	0.0008	0.0564	0.0384	< 0.0001	< 0.0001	< 0.0001	0.0002	0.6055	< 0.0001	0.0878	0.001	0.4348	< 0.0001	0.1649	< 0.0001	< 0.0001	0.1003	0.0068	0.0206	0.1104	0.0043	0.4044	< 0.0001	0.2012	0.0576	0.0653	1
CYP3A43	0.9474	0.0529	0.0003	< 0.0001	< 0.0001	< 0.0001	< 0.0001	< 0.0001	< 0.0001	< 0.0001	0.0001	< 0.0001	< 0.0001	0.0216	0.1564	< 0.0001	< 0.0001	< 0.0001	0.2694	0.2231	< 0.0001	< 0.0001	< 0.0001	< 0.0001	< 0.0001	< 0.0001	0.5804	0.1816	0.4578	< 0.0001	0.6844	0.961	0.0045	< 0.0001	1
CYP3A5	0.9035	< 0.0001	0.6574	0.4014	0.462	0.5166	0.3495	0.7473	0.0781	0.0321	0.002	0.3023	0.9957	0.1317	0.9551	0.0277	0.104	0.5526	0.2201	< 0.0001	0.8517	0.3505	0.51	0.0344	0.6281	0.4373	0.0042	< 0.0001	0.0832	0.9009	0.1624	0.1257	0.81	< 0.0001	0.003	1
CYP3A7	0.667	< 0.0001	0.0003	< 0.0001	< 0.0001	< 0.0001	< 0.0001	< 0.0001	< 0.0001	0.0006	< 0.0001	< 0.0001	< 0.0001	< 0.0001	0.8012	< 0.0001	< 0.0001	< 0.0001	0.7097	0.2192	0.0028	< 0.0001	< 0.0001	< 0.0001	< 0.0001	< 0.0001	0.1547	0.1185	0.6265	< 0.0001	0.2341	0.0656	0.0026	< 0.0001	< 0.0001	< 0.0001	1
UGT2B15	< 0.0001	0.1544	0.0036	0.0012	< 0.0001	< 0.0001	0.0001	< 0.0001	0.0017	0.0073	0.0428	0.7346	0.0004	0.0079	0.0779	< 0.0001	0.0001	< 0.0001	0.0197	0.0857	0.8472	< 0.0001	< 0.0001	< 0.0001	0.0023	< 0.0001	0.1112	< 0.0001	0.0003	< 0.0001	< 0.0001	< 0.0001	< 0.0001	0.0312	0.0003	0.4847	0.0008	1
UGT2B17	< 0.0001	0.1622	0.0051	0.0018	< 0.0001	< 0.0001	0.0003	< 0.0001	0.0029	0.0105	0.0497	0.6997	0.0005	0.0132	0.071	< 0.0001	0.0002	< 0.0001	0.0213	0.0964	0.9137	< 0.0001	< 0.0001	< 0.0001	0.0038	0.0002	0.1014	< 0.0001	0.0003	< 0.0001	< 0.0001	< 0.0001	< 0.0001	0.0363	0.0004	0.4975	0.001	< 0.0001	1
UGT2B7	0.4839	0.1315	0.0364	< 0.0001	< 0.0001	< 0.0001	< 0.0001	< 0.0001	< 0.0001	0.0001	0.0002	0.0551	< 0.0001	< 0.0001	0.0607	< 0.0001	< 0.0001	< 0.0001	0.5452	0.7057	0.0901	< 0.0001	< 0.0001	< 0.0001	< 0.0001	< 0.0001	0.5499	< 0.0001	0.1117	< 0.0001	0.9339	0.3499	0.0003	< 0.0001	< 0.0001	0.7118	< 0.0001	< 0.0001	< 0.0001	1
